# Supplementary material for: Unprecedented combination of regioselective hydrodefluorination and ligand exchange reaction during the syntheses of tris-cyclometalated iridium(iii) complexes
Source: Royal Society of Chemistry journal article supplement (doi:10.1039/c2dt32071a), 2012-12-13
Supplement: c2dt32071a.pdf [file c2dt32071a.pdf]

# Unprecedented Combination of Regioselective Hydrodefluorination and Ligand Exchange Reaction during the Syntheses of *Tris* Cyclometalated Iridium (III) Complexes

Marc Lepeltier,<sup>a</sup> Frédéric Dumur,<sup>b,\*</sup> Jérôme Marrot,<sup>a</sup> Emmanuel Contal,<sup>b</sup> Denis Bertin,<sup>b</sup> Didier Gigmes<sup>b</sup> and Cédric R. Mayer<sup>c</sup>

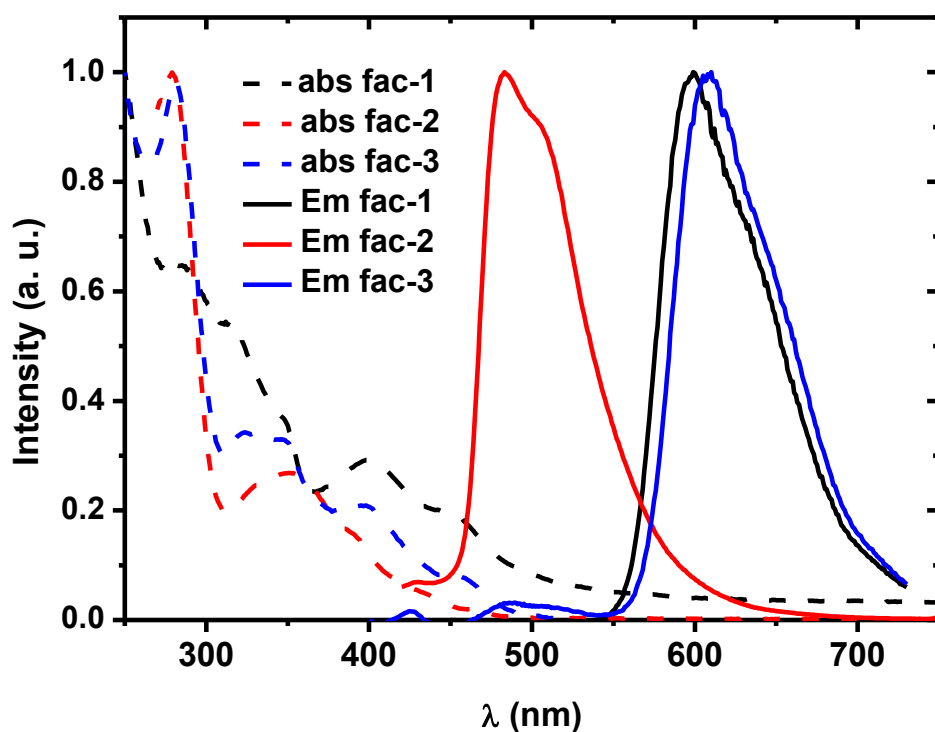

**Fig. 1** Absorption (dash) and emission (solid) spectra of *fac-1* (black), *fac-2* (red) and *fac-3* (blue) recorded in CH<sub>2</sub>Cl<sub>2</sub> at room temperature.

|              | $\lambda_{\text{em}}$ (nm) |
|--------------|----------------------------|
| <i>fac-1</i> | 599                        |
| <i>fac-2</i> | 483                        |
| <i>fac-3</i> | 609                        |
